# Supplementary material for: Somatic mutations and single-cell transcriptomes reveal the root of malignant rhabdoid tumours
Source: PubMed Central journal article supplement (PMC7930245; doi:10.1038/s41467-021-21675-6), 2021-03-03
Supplement: 41467_2021_21675_MOESM1_ESM.pdf [file 41467_2021_21675_MOESM1_ESM.pdf]

## **Supplementary Information**

**Somatic mutations and single cell transcriptomes reveal the root of malignant rhabdoid tumours**

**Custers, Khabirova, Coorens et al.**

**A**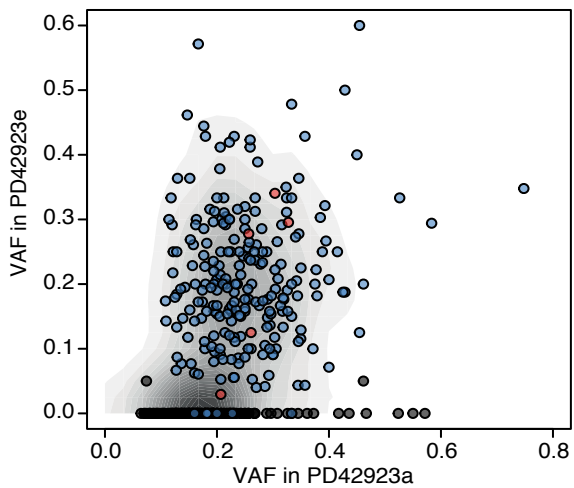**B**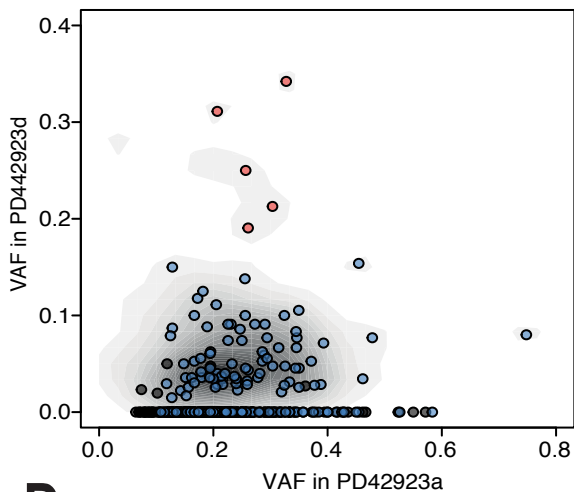**C**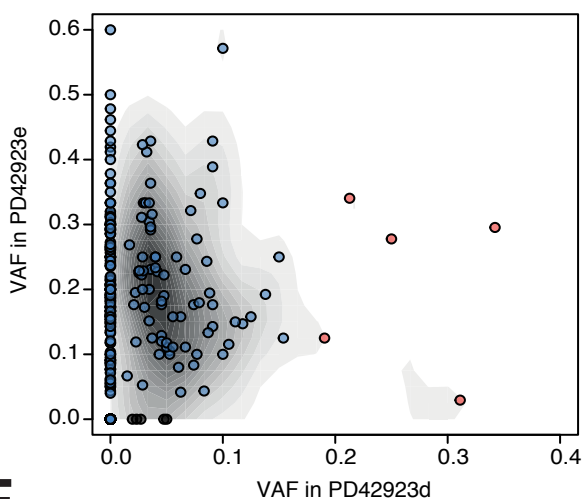**D**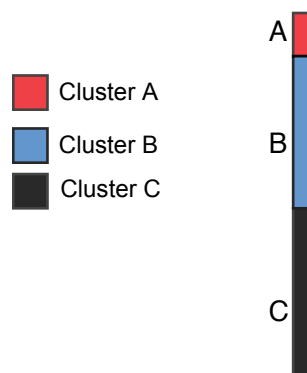**E**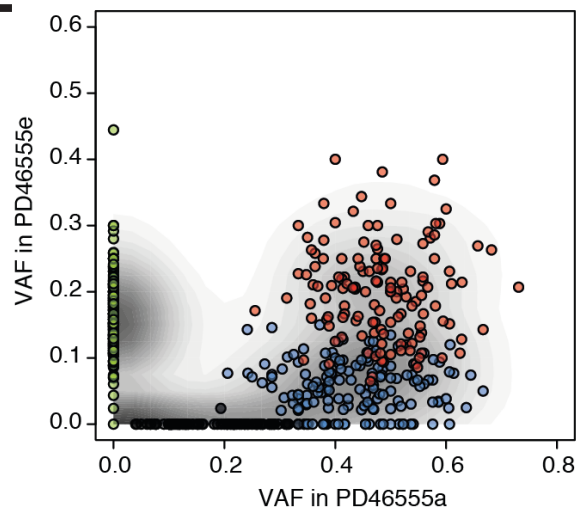**F**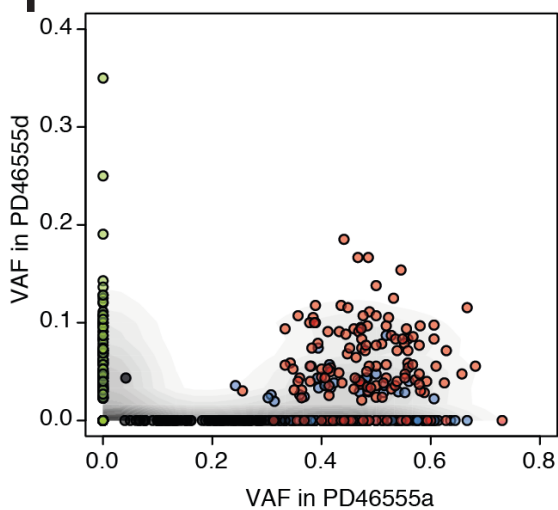**G**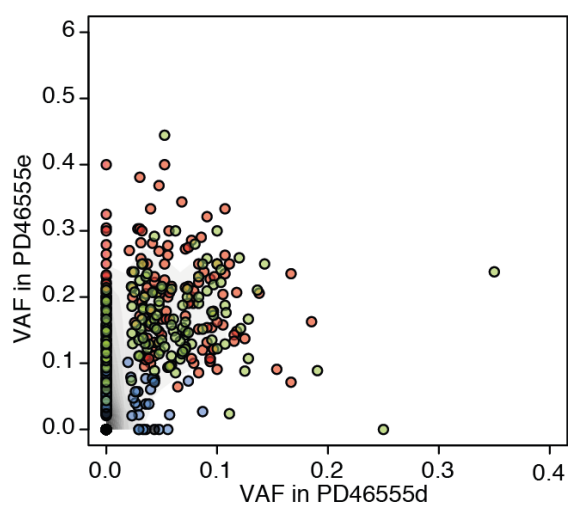**H**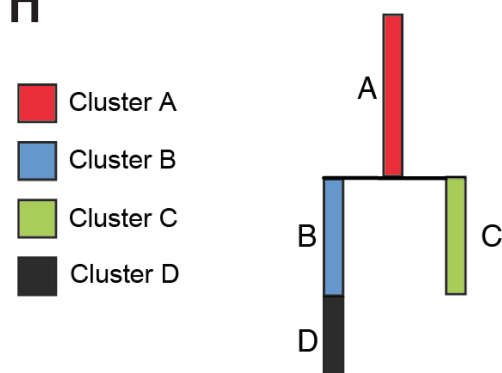

**Supplementary Figure 1 | Clonal reconstruction of normal tissues in PD42923 and PD46555.**

(A) - (D) Clustering of SNVs across PD42923a, -d, and -e revealed four clusters contributing to their clonal architecture. Comparison of VAFs of these mutations between the different samples of PD42923 (A-C) reveals the phylogenetic ordering of these clusters (D). (E) - (H) Clustering of SNVs across PD46555a, -d, and -e revealed four clusters contributing to their clonal architecture. Comparison of VAFs of these mutations between the different samples of PD46555 (E-G) reveals the phylogenetic ordering of these clusters (H). The possibility that we observed tumour mutations in normal tissue because of contamination with tumour cells was addressed in three ways. Firstly, specialist pathologists reviewed sections of the pieces of tissues that we sequenced. In the hilar samples there were no tumour cells seen. In the nerve root samples, occasional tumour cells were seen. However, the frequency of these was small and could not account for the clone size observed in nerve root samples. PD46555g (cervical spine sample) was found to be heavily contaminated with tumour cells (>10%) upon inspection by the pathologists. This fraction outnumbered the INI1 negative normal cells, and hence any genomic signal of mutational sharing is likely derived from the contaminant. Therefore, we have excluded this sample from further analysis. Secondly, we performed INI1 staining to validate the expected loss of INI1 staining in normal Schwann cells, as predicted from the genomic data. This confirmed that there were morphologically normal looking Schwann cells that lacked INI1 staining in all samples that exhibited biallelic loss of *SMARCB1* genomically. Thirdly, we applied a Dirichlet process mixture modelling to define the cluster composition of the normal tissues. Tumour contamination would manifest by a single cluster, corresponding to the clonal tumour somatic mutations, being present in the normal at the contamination rate. However, we observed that the clonal tumour mutations fall into two clusters with a differential contribution to the normal tissues. This would be inconsistent with a single, clonal contaminant. In addition, such contamination would not explain mutations that are private to the normal tissues and not found in tumour tissues, of which there were many.

# A PD42923

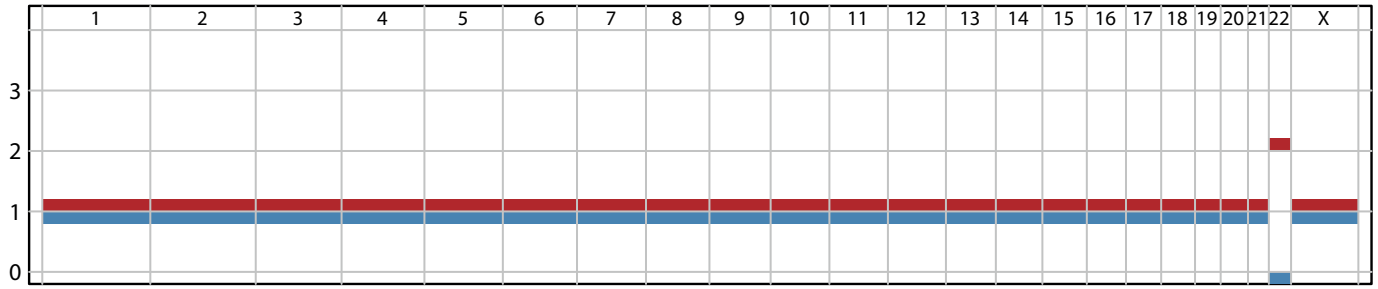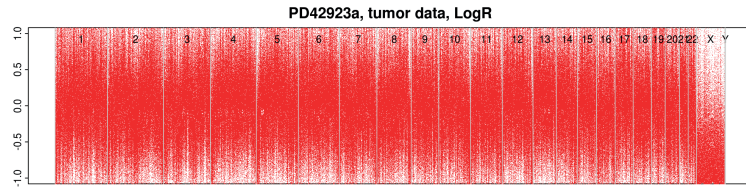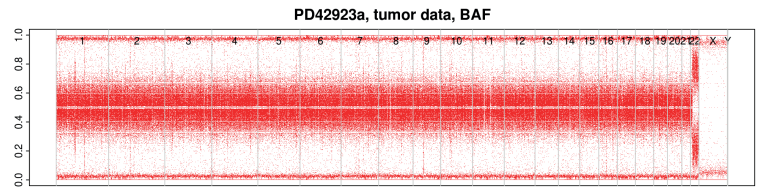

# B PD46555

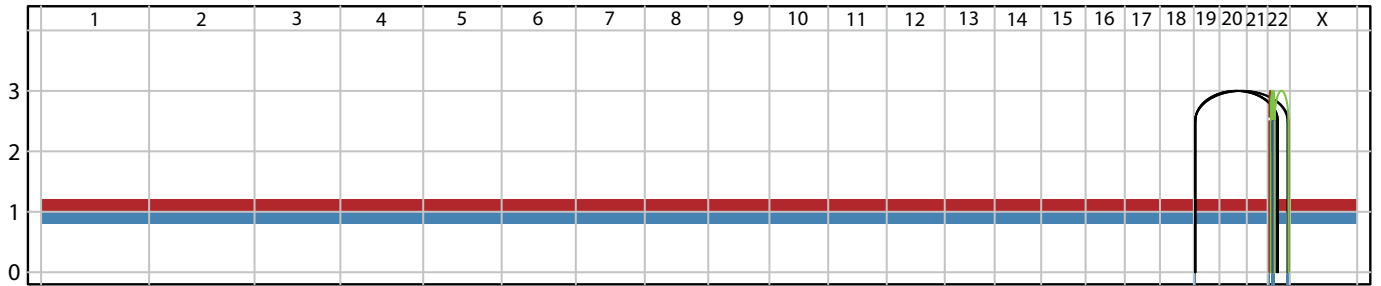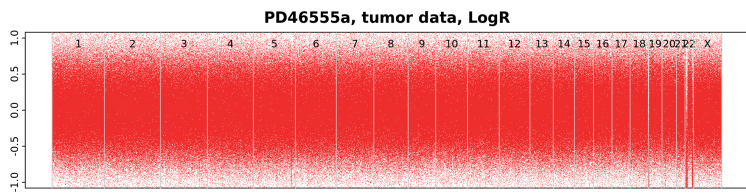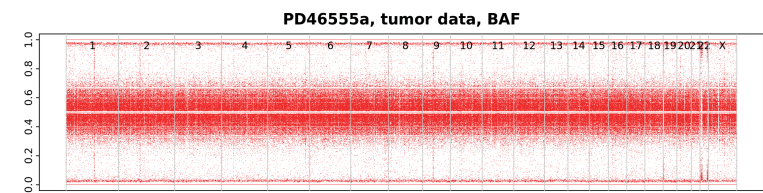

# C PD46555; Chromosome 22

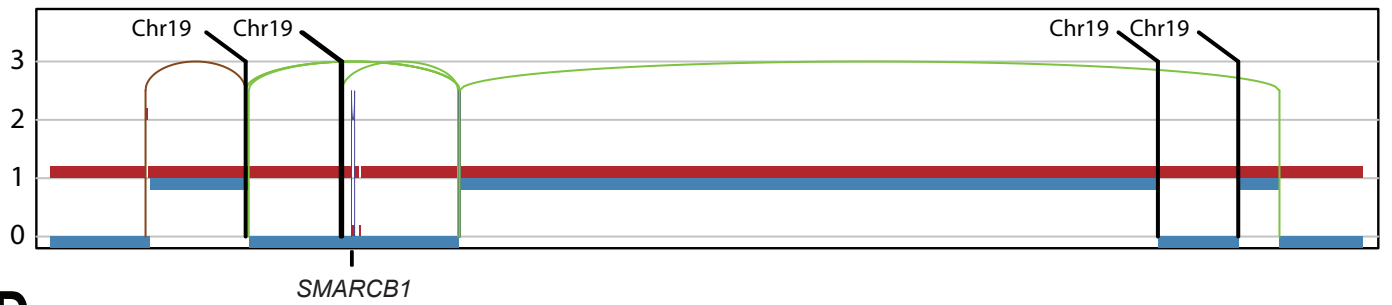

# D PD46555; Chromosome 19

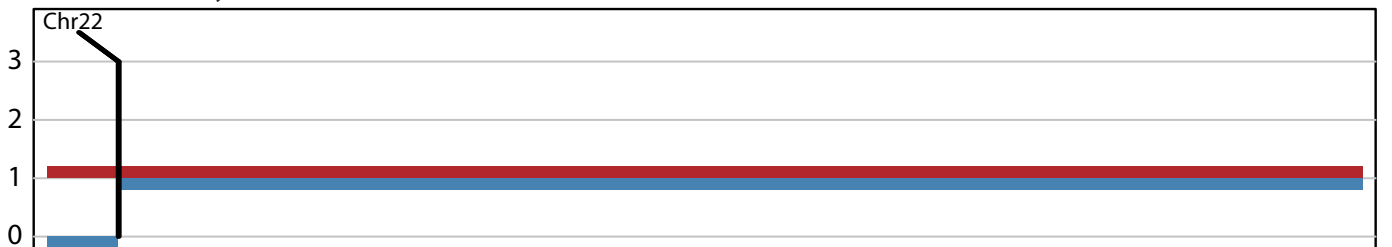

### **Supplementary Figure 2 | Overview of CNVs and SVs in two MRT samples.**

Copy number variants (CNVs) and structural variants (SVs) for the malignant rhabdoid tumours of PD42923 (**A**) and PD46555 (**B**), genome-wide. Major and minor copy numbers are displayed in red and blue, respectively. Black lines denote interchromosomal translocations, green inversions, brown tandem-duplications, and blue deletions. The genome-wide distributions of the log-transformed normalised read depth (logR) and B-allele frequency (BAF) are displayed below the copy number landscapes. In both cases, chromosome 22, the location of *SMARCB1*, is affected. PD42923 displays a copy number neutral loss of heterozygosity of chromosome 22. For PD46555, enhanced representations of chromosome 22 (**C**), and chromosome 19 (**D**) reveal complex rearrangements affecting the tumour.

**A**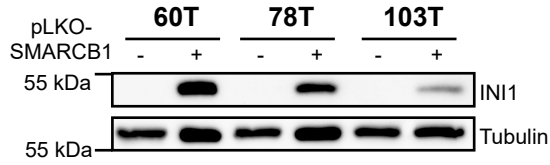**B**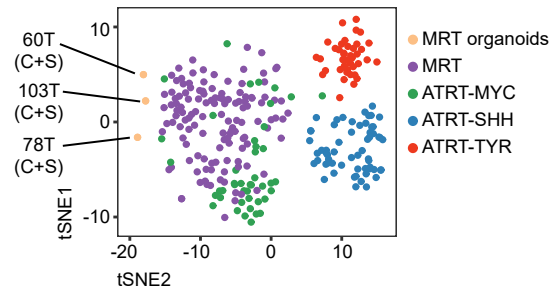**C**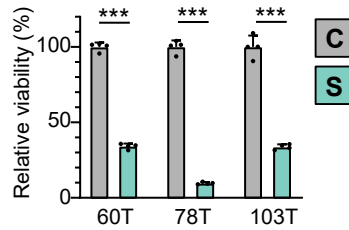**D**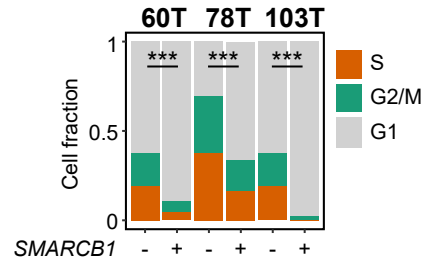**E**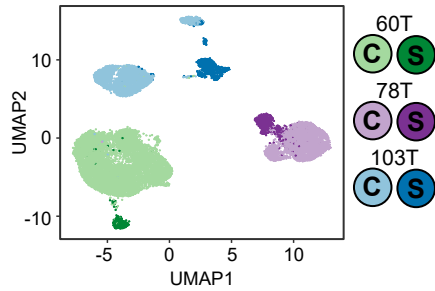**F**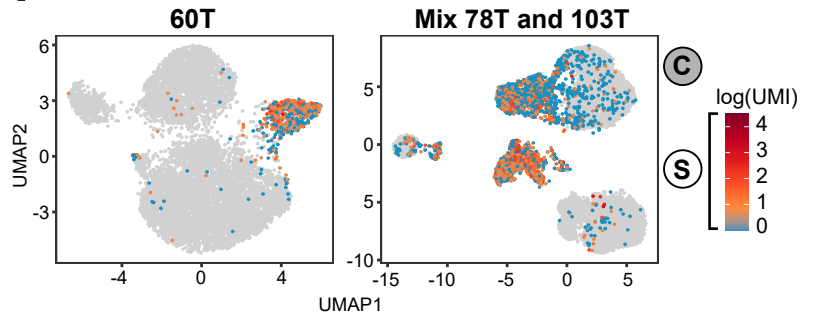**G**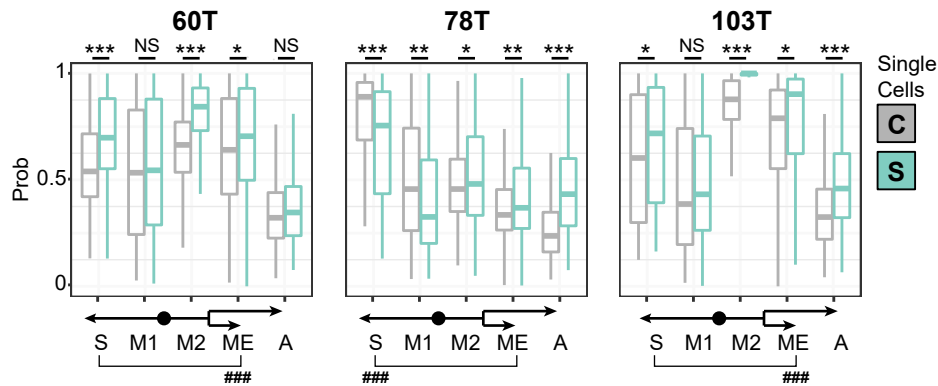**H**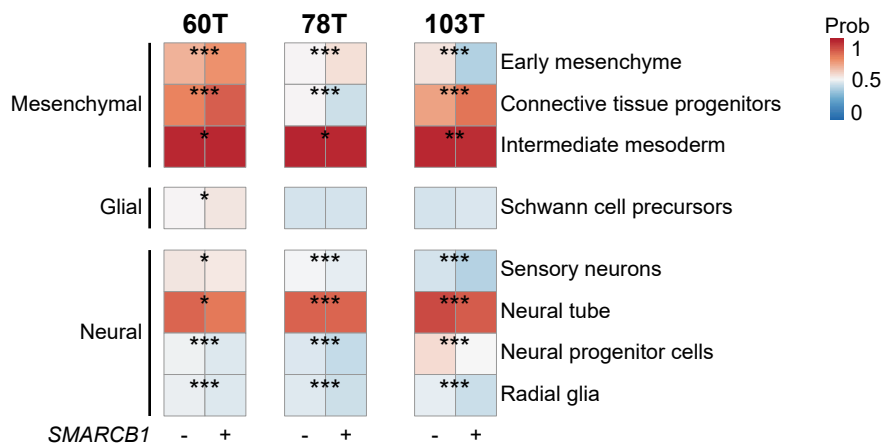

**Supplementary Figure 3 | *SMARCB1* reconstitution in organoids as model for MRT differentiation.**

(A) Western blot analysis of INI1 expression in MRT organoids lentivirally transduced with either a control (-) or *SMARCB1* expression (+) plasmid. Tubulin protein levels are used as loading control. Molecular weight markers are indicated in kilodalton (kDa). Source data are provided as a Source Data file. (B) t-SNE representation of DNA methylation profiles of MRT control (C) and *SMARCB1*<sup>+</sup> (S) organoids compared to MRT and AT/RT (subtypes MYC, SHH, TYR) tissue, showing that MRT organoids cluster closely to MRT tissue independent of *SMARCB1* expression. t-SNE coordinates of MRT control and *SMARCB1*<sup>+</sup> organoids completely overlap. Different patient lines are indicated. (C) Bar graphs represent cell viability of MRT *SMARCB1*<sup>+</sup> (green) relative to MRT control organoids (gray). Mean and SD (error bars) of 4 technical replicates (dot) are indicated. Source data are provided as a Source Data file. Growth was assessed by comparing control to *SMARCB1*<sup>+</sup> organoids. P-values were calculated using an unpaired Student's t test (two-tailed): \* <0.05, \*\* <0.01, \*\*\* <0.001 (p-value: 60T=2.1e-8, 78T=1.4e-8, 103T=2.5e-6). (D) Stacked bar plot represents relative frequencies of single cells from MRT control (-) or *SMARCB1*<sup>+</sup> (+) organoids annotated for cell cycle phase (derived from single cell transcriptomes). Colours distinguish G1 (gray), G2/M (green) or S (orange) phase. Frequencies of cell cycle phase annotations were compared between control and *SMARCB1*<sup>+</sup> organoids for each patient line. P-values were calculated using a chi-square test (two-tailed): \*\*\* <1e-15 (-log<sub>10</sub>(p-value): 60T=27, 78T=77, 103T=96). (E) UMAP representation of single cells from MRT organoid lines 60T (green, control/*SMARCB1*<sup>+</sup>: 8059/425 cells), 78T (purple, control/*SMARCB1*<sup>+</sup>: 3195/806 cells) and 103T (blue, control/*SMARCB1*<sup>+</sup>: 2694/953 cells) distinguishing control (light) and *SMARCB1*<sup>+</sup> (dark) cells. (F) UMAP representation of single cells separated by sample: 60T (control/*SMARCB1*<sup>+</sup>: 8059/638 cells) or mix 78T and 103T (control/*SMARCB1*<sup>+</sup>: 7214/3389 cells; demultiplexing was performed as described in Methods). For these UMAPs, cells were not filtered for *SMARCB1* expression and thus include non-transduced cells, demonstrating that unsuccessfully transduced cells in the *SMARCB1*<sup>+</sup> sample cluster with control-transduced cells thereby excluding batch effects. Colour distinguishes the batch of MRT control cells (gray) from the batch of MRT *SMARCB1*<sup>+</sup> cells (colour-code from blue to red refers to *SMARCB1* transcript levels (unique molecular identifier (UMI)). *SMARCB1*-negative cells were filtered out from *SMARCB1*<sup>+</sup> samples for all subsequent analysis. (G) Box plots represent single cell similarity

scores (n = 60T control/*SMARCB1*<sup>+</sup>: 8059/425 cells; 78T control/*SMARCB1*<sup>+</sup>: 3195/806 cells; 103T control/*SMARCB1*<sup>+</sup>: 2694/953 cells) for cell types of the mesenchyme/autonomic (ME/A) or sensory (S) branch (illustrated in Fig. 2a). Box plots indicate median (middle line), 25<sup>th</sup> and 75<sup>th</sup> percentile (box). Whiskers represent the range excluding outliers. Mesenchyme and sensory similarity were compared for control cells to identify the major neural crest cell type signal at baseline. P-values were calculated using a paired Student's t test (two-tailed): ### <1e-15 below figure to indicate cell type with highest average similarity score (-log<sub>10</sub>(p-value): 60T=100, 78T=Inf, 103T=52). Additionally, similarity scores were compared between control and *SMARCB1*<sup>+</sup> cells. P-values were calculated using an unpaired Student's t test (two-tailed): \* <1e-3, \*\* <1e-9, \*\*\* <1e-15 (exact p-values are indicated in Supplementary Table 4). **(H)** Heatmaps represent similarity of MRT control (-) and *SMARCB1*<sup>+</sup> (+) cells to a mouse organogenesis cell type reference<sup>19</sup>, comparing early mesenchymal and neural cell type similarities. Colours represent the average probability (prob) that the MRT cells are similar to the indicated cell type (predicted similarity score estimated by logistic regression<sup>12</sup>). Changes in similarity scores between control and *SMARCB1*<sup>+</sup> cells were assessed. P-values were calculated using an unpaired Student's t test (two-tailed): \* <1e-3, \*\* <1e-9, \*\*\* <1e-15 (exact p-values are indicated in Supplementary Table 4).



**A**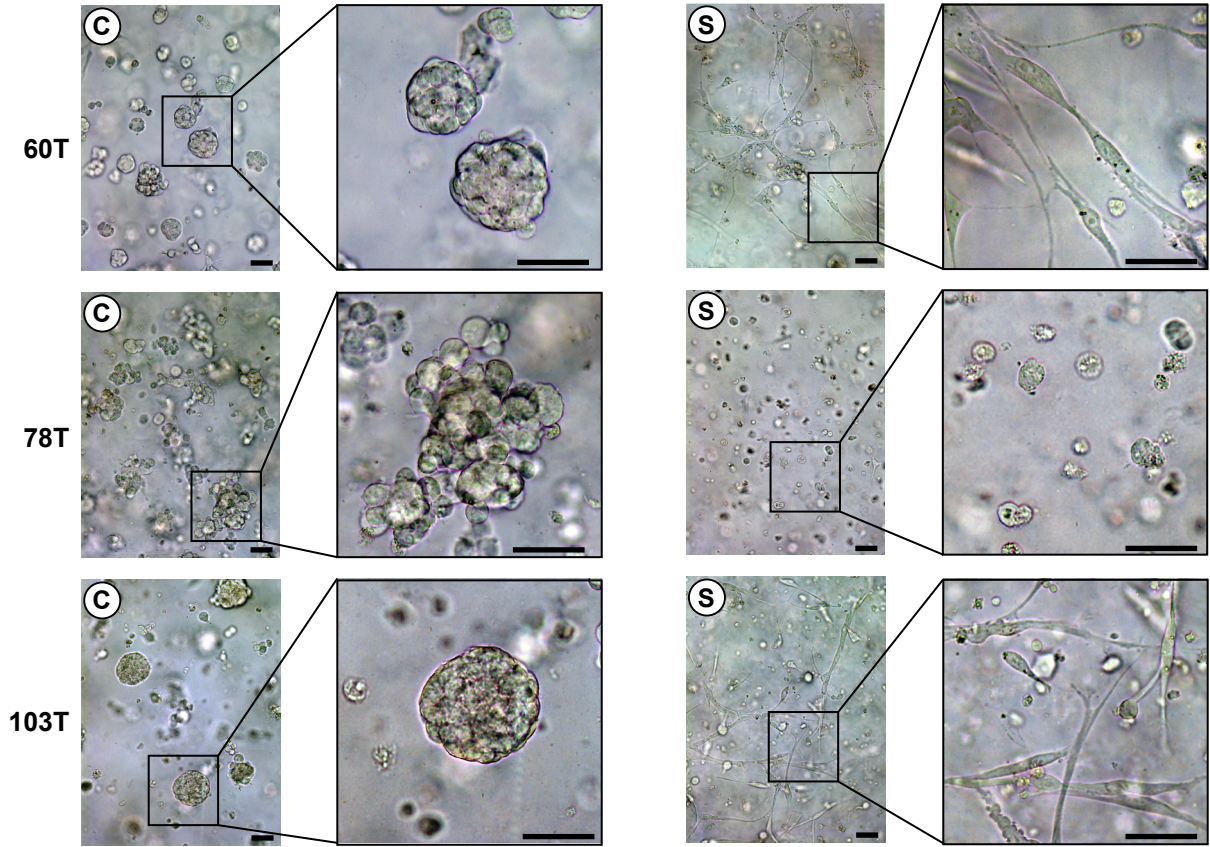**B**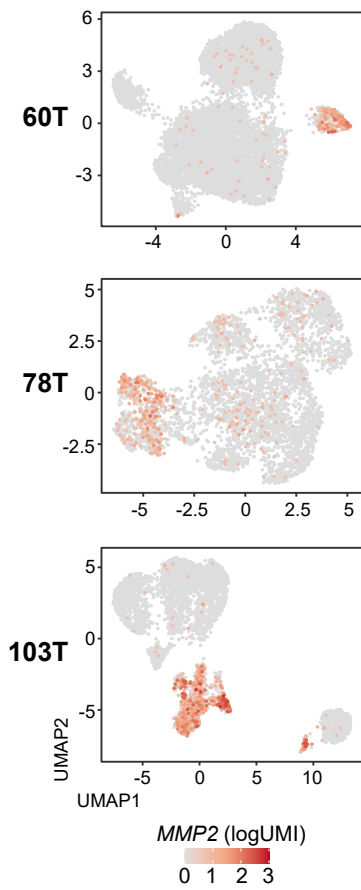**C**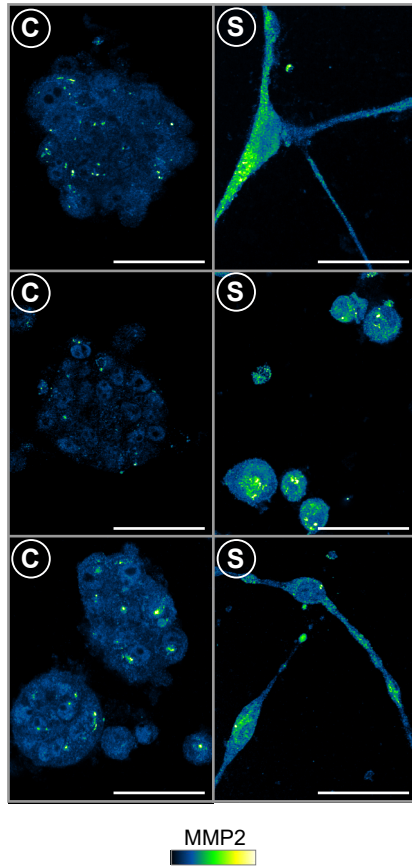**D**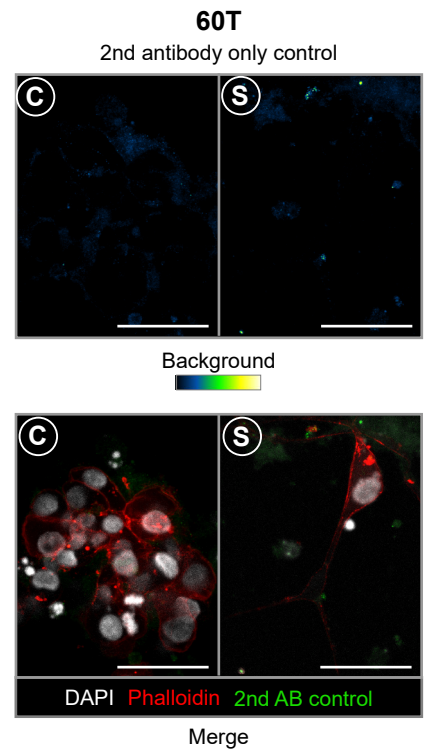

**Supplementary Figure 4 | Morphological transformation of MRT organoids upon *SMARCB1* reconstitution.**

(A) Representative brightfield images of MRT control (C) and *SMARCB1*<sup>+</sup> (S) organoid lines including zoom in. Scale bars equal 100  $\mu$ m. (B) UMAP representation of single cells from MRT control and *SMARCB1*<sup>+</sup> organoid lines. Colour-code from gray to red refers to *MMP2* transcript levels (unique molecular identifier (UMI)). (C) Representative immunofluorescence images of MRT control (C) and *SMARCB1*<sup>+</sup> (S) organoids stained for *MMP2*. Merged images are shown in Fig. 2b. Colour-code represents immunofluorescent signal intensity. Scale bars equal 50  $\mu$ m. (D) Representative immunofluorescence images of 60T control (C) and *SMARCB1*<sup>+</sup> (S) organoids only incubated with the secondary antibody, to determine background signal (top panel). Colour-code represents immunofluorescent signal intensity. Bottom panel shows a merge of DAPI (white; nuclei), phalloidin (red; membranes) and background signal (green). Scale bars equal 50  $\mu$ m.

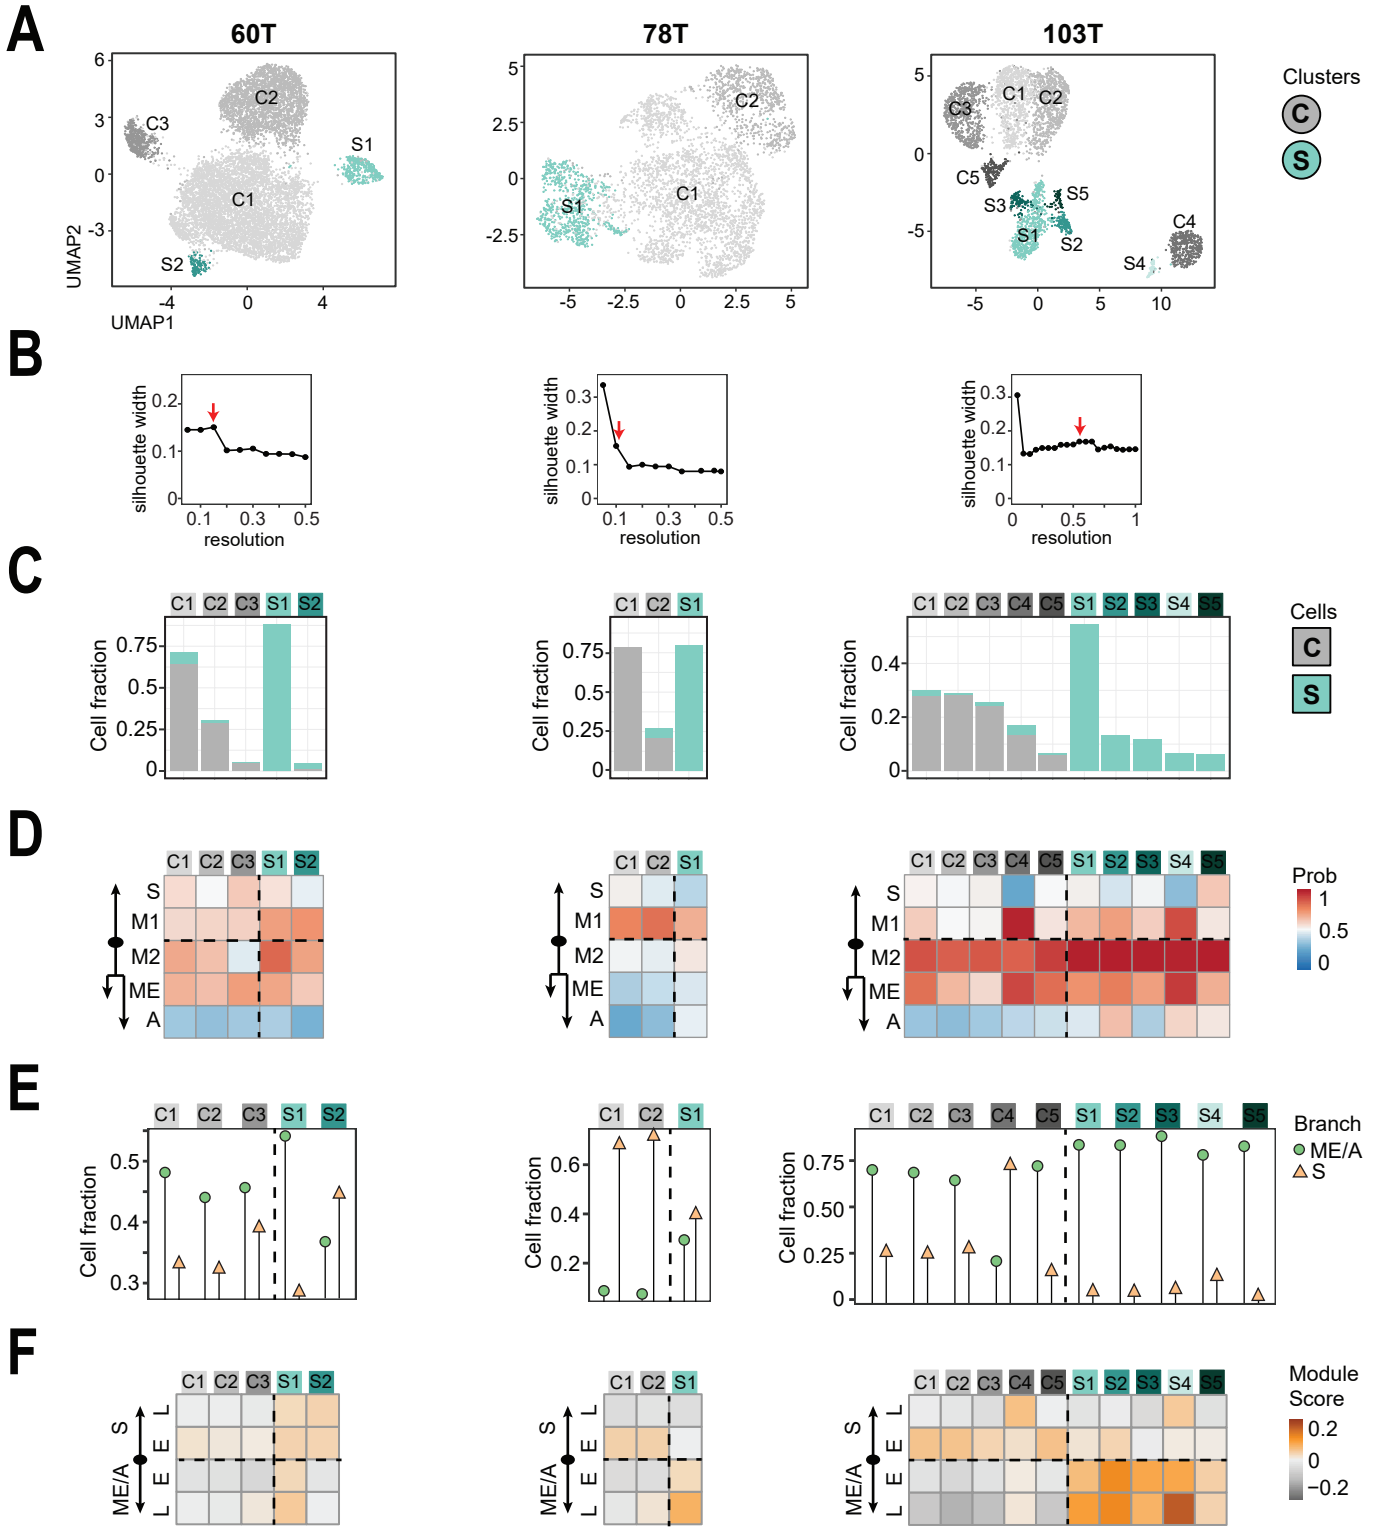

### Supplementary Figure 5 | Intra-organoid heterogeneity of neural crest signals.

(A) UMAP representation of single cells from MRT control and *SMARCB1*<sup>+</sup> organoid lines showing cluster assignment. Cells are coloured for either control (gray: light to dark) or *SMARCB1*<sup>+</sup> (green: light to dark) dominant clusters, which are numbered according to cluster size. (60T C1-3/S1-2: 5,209/2,350/425/375/125 cells, 78T C1-2/S1: 2,624/725/652 cells, 103T C1-5/S1-5: 769/768/664/395/172/521/126/110/64/58 cells) (B) Scatter plot depicts a series of resolutions used for the Louvain-based clustering of MRT control and *SMARCB1*<sup>+</sup> single cells, and the corresponding quantification of average silhouette width, which was used to determine optimal clustering resolution. The resolution with the highest average silhouette width (arrow) was used for subsequent analyses. (C) Stacked bar plots represent relative frequencies of control (gray) and *SMARCB1*<sup>+</sup> (green) single cells for each cluster, showing a segregation of cells upon *SMARCB1* reconstitution. (D) Heatmaps show average similarity score per cluster dominant for either MRT control (gray) or *SMARCB1*<sup>+</sup> (green) cells. Clusters were compared to cell types from the mesenchymal/autonomic or sensory branch, showing heterogeneity of neural crest signals within and between patient lines. Abbreviations are indicated in Fig. 2a. (E) Graphs represent relative frequencies of cell type annotations for MRT control (gray) or *SMARCB1*<sup>+</sup> (green) dominant clusters. Cell type annotation was assigned for each single cell based on the highest similarity score. Cell type annotations were grouped into the mesenchymal/autonomic (ME/A; green circle) or sensory (S; orange triangle) differentiation branch. (F) Heatmaps represent average gene module scores for MRT control (gray) or *SMARCB1*<sup>+</sup> (green) dominant clusters. Module scores were generated by averaging gene expression levels per set of genes. Gene sets include marker genes for either sensory (S) or mesenchymal/autonomic (ME/A) differentiation branches, distinguishing early (E) and late (L) differentiation genes.

**A**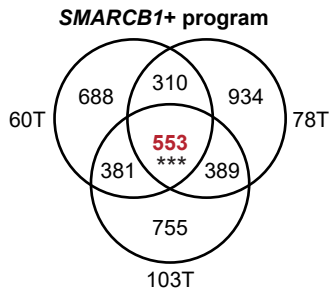**B**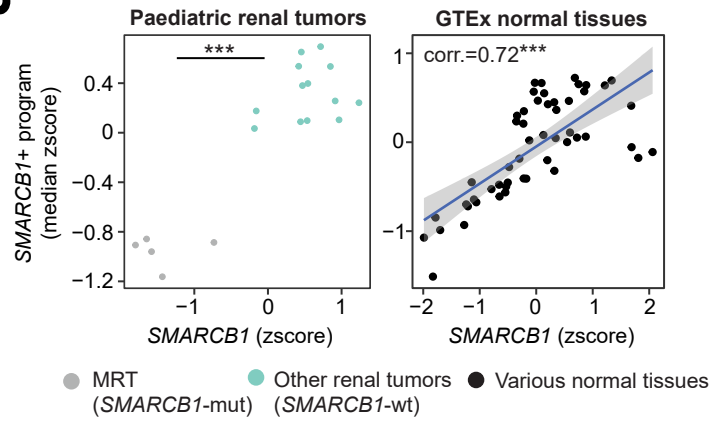**C**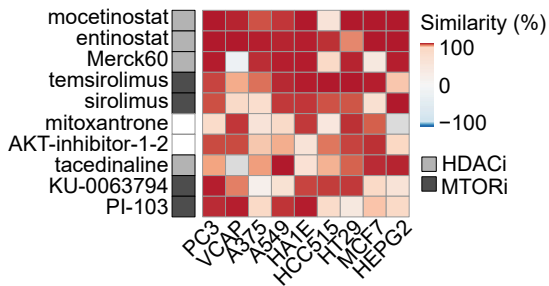**D**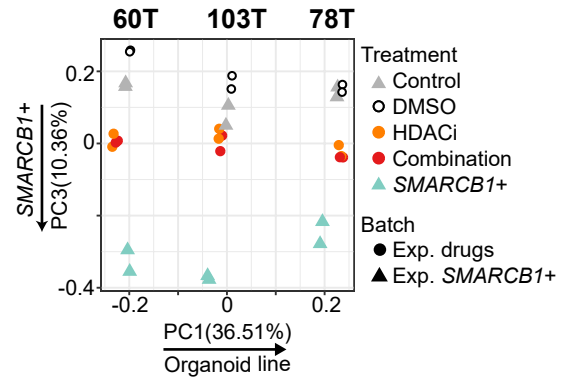**E**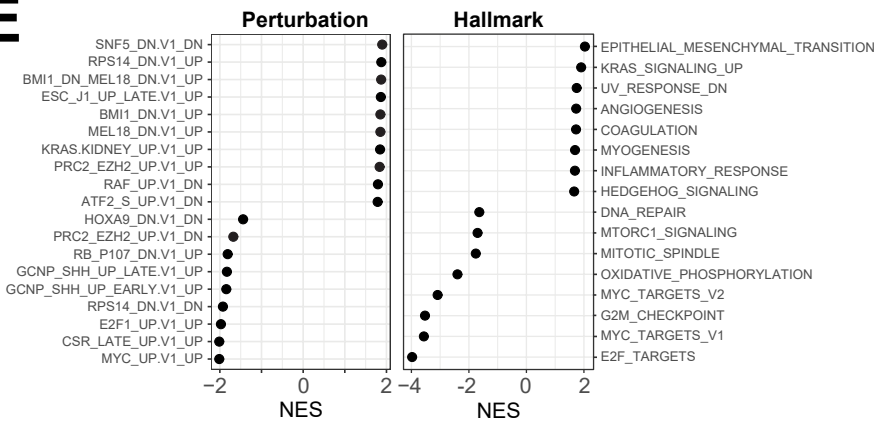**F**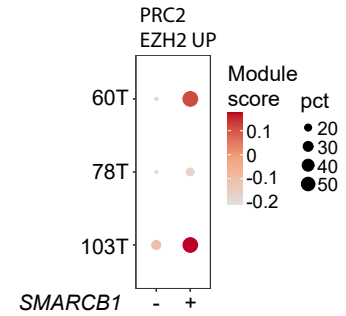**G**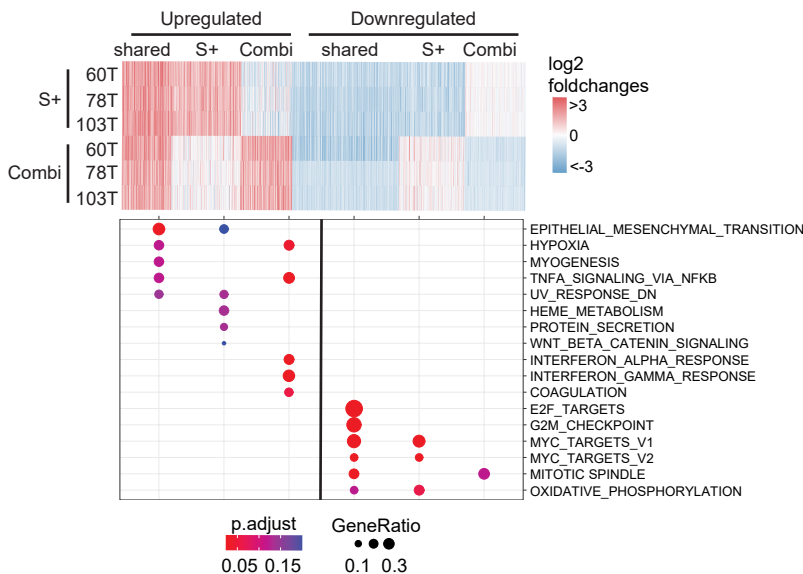**H**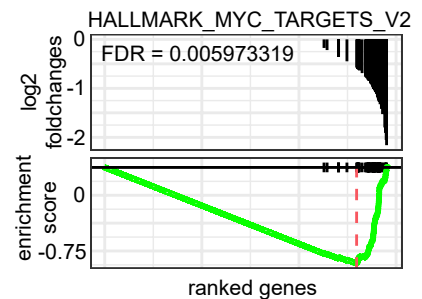**I**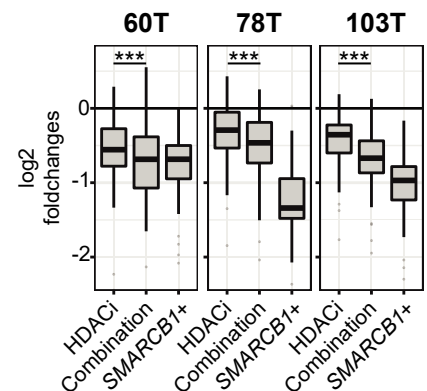

## Supplementary Figure 6 | Finding drugs mimicking *SMARCB1*-induced MRT differentiation.

(A) Venn diagram showing the overlap of genes (red) upregulated by *SMARCB1* in MRT organoids, further referred to as the *SMARCB1*+ program. The intersect was assessed for three independent patient lines. P-value was calculated using a multi-set exact test (one-tailed)<sup>48</sup>: \*\*\* <1e-15 (p-value: 0) (B) Scatter plot showing the relative expression (median z-score) of the *SMARCB1*+ program versus *SMARCB1* expression levels (z-score) for tissues from a paediatric renal tumour biobank<sup>17</sup> (left) or normal tissues (right). The expression of the *SMARCB1*+ program was compared between *SMARCB1* mutant (mut) tissues (MRT; gray; n = 5) and *SMARCB1* wild-type tissues (wt; other renal tumours; green; n = 13). P-values were calculated using an unpaired Student's t test (two-tailed): \*\*\* <0.001 (p-value=5.5e-10). In normal tissues (black), the relationship of *SMARCB1* expression levels and the *SMARCB1*+ program was assessed. Correlation coefficient (corr.) and p-value were calculated using Pearson's correlation: \*\*\* <0.001 (p-value=2.2e-9). (C) Represented is the top 10 of drugs that mimic mRNA changes of *SMARCB1* re-expression, extracted from the CLUE database<sup>20</sup>. Colour-code represents the percentage of similarity for each cell line (x-axis) and drug treatment (y-axis) to *SMARCB1* re-expression. Drugs are annotated as HDAC (dark-gray) or mTOR (light-gray) inhibitors. (D) Principal component analysis (PCA) of bulk mRNA-seq samples shows the transcriptional effect of indicated drug treatment (different colours) on MRT organoids, compared with MRT control (gray) or *SMARCB1*+ (green) organoids (n = 2 independent experiments). PC1 and PC3 separate samples by organoid line and drug treatment/*SMARCB1* re-expression. Batch refers to either the experiment with *SMARCB1* re-expression (*SMARCB1*+) or drug treatment (drugs). (E) Gene set enrichment analysis (GSEA) for hallmark and perturbation gene sets, using genes ranked by the mRNA changes induced by *SMARCB1*. The top 10 of statistically significant gene sets (adjusted p-value <0.01) is presented for up- and downregulated genes, showing the normalized enrichment score (NES) on the x-axis. P-values were calculated using a permutation test (two-tailed) and were corrected for multiple-testing. (F) Genes repressed by polycomb repressive complex subunit EZH2 were upregulated by *SMARCB1* (Supplementary Fig. 6e). This result was confirmed in the scRNA-seq experiment. Dot plot shows gene module scores (average gene expression level for PRC2\_EZH2 gene set) for MRT control (-) and *SMARCB1*+ (+) organoids for each patient line. Colour-code from gray to red refers to average module score. Dot size refers to the percentage of

cells (pct) expressing the gene module. **(G)** Enrichment analysis for hallmark pathways using unordered sets of differentially expressed genes upon *SMARCB1* re-expression (S+) or combination treatment, either shared or exclusive. The top 5 of significantly enriched terms (adjusted p-value <0.25) are presented (bottom). P-values were calculated using a Fischer's exact test (one-tailed) and were corrected for multiple-testing. Changes in mRNA levels for these genes are visualized in the heatmap (top) for each patient line. **(H)** Gene set enrichment analysis for MYC target genes, with bars representing average mRNA changes of *SMARCB1* re-expression in MRT organoids (top). Enrichment score is visualized by the ranking of genes based on these mRNA changes, showing enrichment for MYC targets with genes downregulated by *SMARCB1* re-expression (bottom). **(I)** Boxplots represent mRNA expression changes of MYC target genes (n = 58 genes) induced by either drug treatment or *SMARCB1* re-expression for each MRT organoid line. Box plots indicate median (middle line), 25<sup>th</sup> and 75<sup>th</sup> percentile (box). Whiskers represent the range excluding outliers (dot). Additional effect of combination treatment on MYC target genes (n=58 genes) was assessed by comparing combination with HDACi treatment. P-values were calculated using a paired Student's t test (two-tailed): \*\*\* <0.001 (p-value: 60T=4.9e-6, 78T=9.7e-10, 103T=2.6e-14).

**A**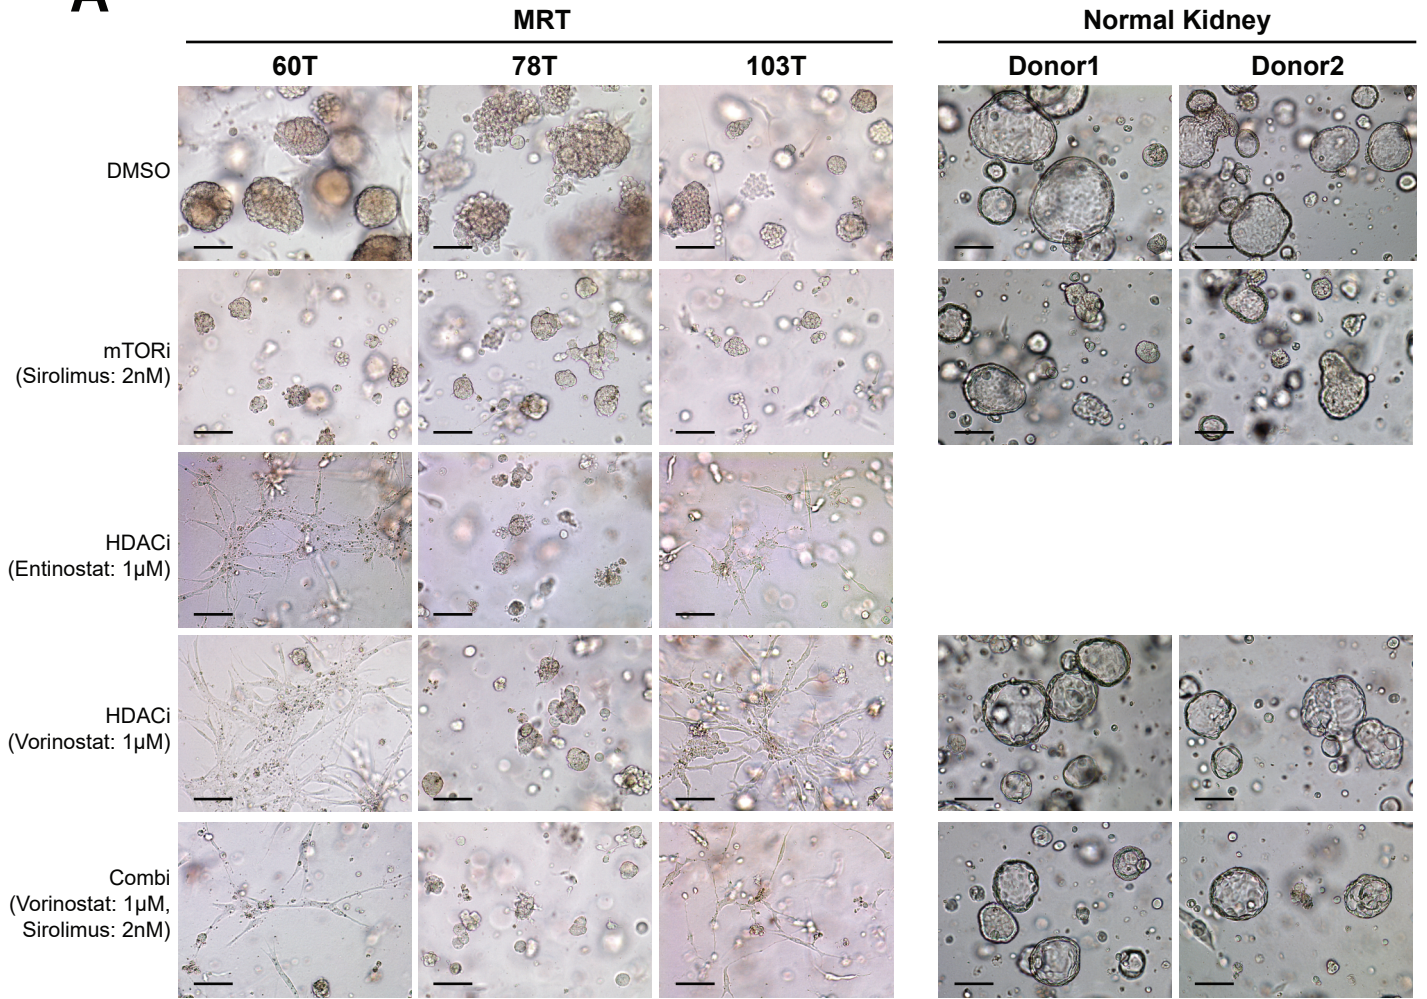**B****regrowth after drug removal**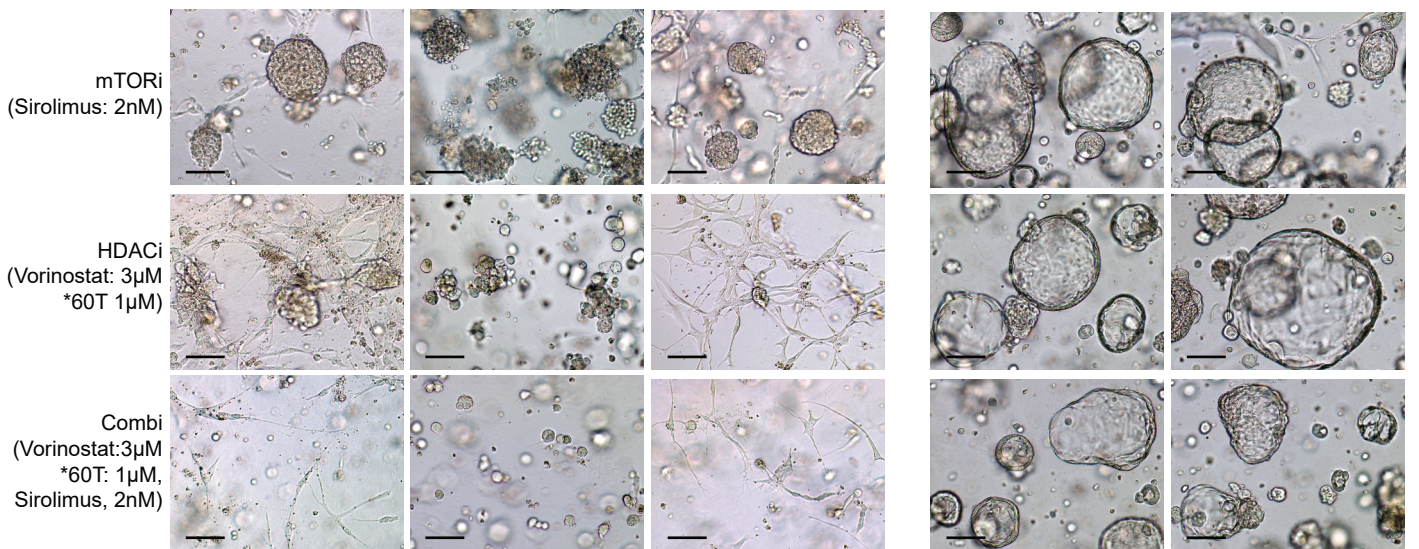



**Supplementary Figure 7 | HDACi and MTORi combination treatment recapitulates MRT *SMARCB1*+ organoid morphology.**

(A) Representative brightfield images of MRT and normal kidney organoid lines treated with vehicle (DMSO), sirolimus (2nM; mTORi), entinostat (1 $\mu$ M; HDACi), vorinostat (1 $\mu$ M; HDACi) or the combination of sirolimus (2nM) and vorinostat (1 $\mu$ M). Scale bars denote 100  $\mu$ m. (B) Representative brightfield images of MRT and normal kidney organoid lines after wash-out of drugs (T2) showing that combination treatment induces a durable differentiation phenotype in MRT. Scale bars denote 100  $\mu$ m.

**A**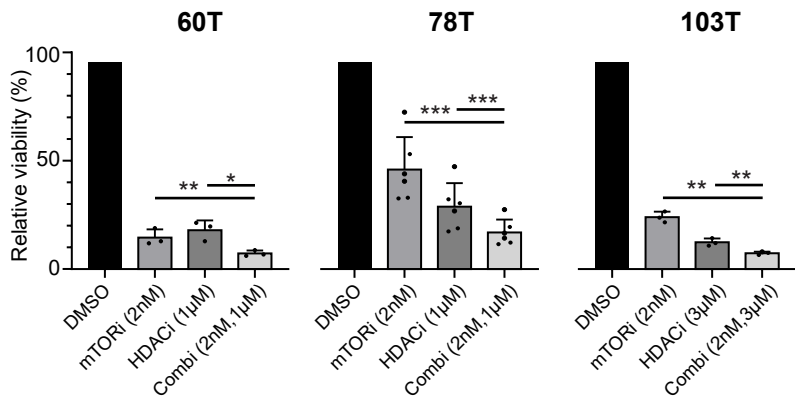**B**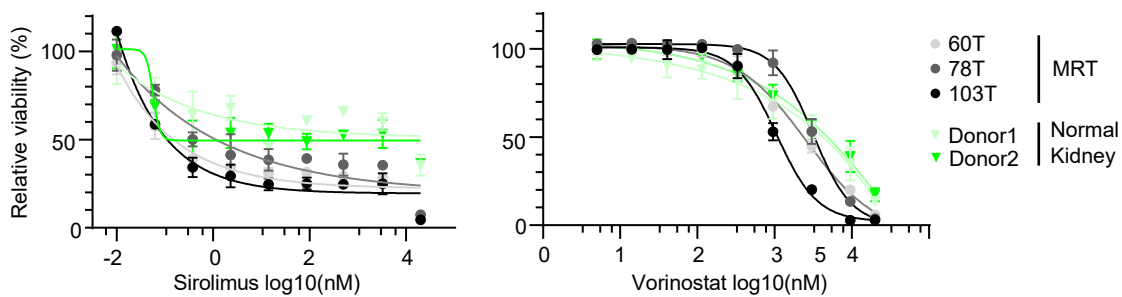**C**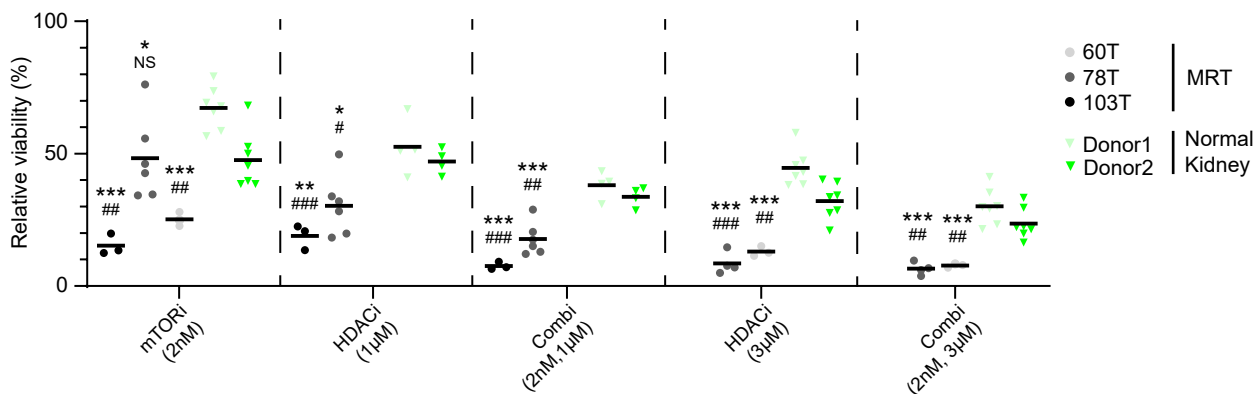**D**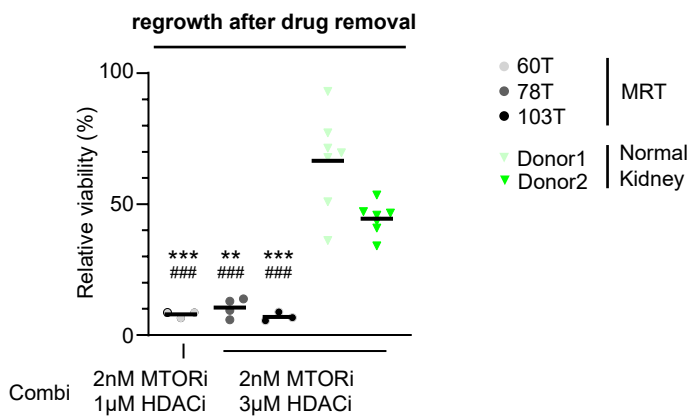

### Supplementary Figure 8 | Growth inhibitory effects of HDACi and MTORi are MRT specific

**(A)** Bar graphs represent the cell viability of MRT organoids after drug treatment (T1) relative to vehicle control (DMSO). Mean and SD (error bars) of independent experiments (dot) are indicated ( $n = 60T/103T: 3; 78T: 6$ ). Each independent experiment is an average of 4 technical replicates. Source data are provided as a Source Data file. The additional effect of drug combination is assessed by comparing combination treatment with either mTORi (2nM) or HDACi (1 $\mu$ M or 3 $\mu$ M). P-values were calculated using an unpaired Student's t test (two-tailed): \* <0.05, \*\* < 0.01, \*\*\* <0.001. (p-value: Combi vs mTORi 60T=0.008, 78T=4.5e-7, 103T=0.003; vs HDACi 60T=0.02, 78T=0.0002, 103T=0.005) **(B)** Dose response curves of sirolimus (mTORi, left) and vorinostat (HDACi, right) on MRT (gray) and normal kidney (green) organoid lines. Each dot and error bar represent the mean and SD of two independent experiments (each independent experiment is an average of 4 technical replicates). Source data are provided as a Source Data file.

**(C)** Graph shows the cell viability of MRT (gray) and normal kidney (green) organoids after drug treatment (T1) relative to vehicle control (DMSO). Organoids were treated with either sirolimus (2nM), vorinostat (1 $\mu$ M or 3 $\mu$ M) or the combination. Each dot represents an independent experiment ( $n = 60T/103T: 3, 78T \text{ mTOR/HDAC}1\mu\text{M/Combi}2\text{nM}1\mu\text{M}: 6, 78T \text{ HDAC}3\mu\text{M/Combi}2\text{nM}3\mu\text{M}: 4, \text{normal kidney}: 7$ ), which is an average of 4 technical replicates. Source data are provided as a Source Data file. The mean is indicated as a horizontal line for each organoid line. Average cell viability of MRT and normal kidney organoids were compared. P-values were calculated using an unpaired Student's t test (two-tailed): test with donor 1 \* <0.05, \*\* < 0.01, \*\*\* <0.001, test with donor 2 # <0.05, ## < 0.01, ### <0.001 (exact p-values are indicated in Supplementary Table 4).

**(D)** Graph shows the cell viability of MRT and normal kidney organoids after drug washout (T2) normalized to timepoint 1 (T1) DMSO controls. Each dot represents an independent experiment ( $n = 60T/103T: 3, 78T: 4, \text{normal kidney}: 7$ ), which is an average of 4 technical replicates. Source data are provided as a Source Data file. The mean is indicated as a horizontal line for each organoid line. Regrowth capability was assessed by comparison of average cell viability of MRT and normal kidney organoids. P-values were calculated using an unpaired Student's t test (two-tailed): test with donor 1 \* <0.05, \*\* < 0.01, \*\*\* <0.001, test with donor 2 # <0.05, ## < 0.01, ### <0.001 (p-value: Donor1 vs 60T=0.0007, vs 78T=0.0002, vs 103T=0.0006; Donor2 vs 60T=2.9e-6, vs 78T=1.3e-6, vs 103T=2.4e-6).

| Case    | Sample   | Sample type          | FFPE | WGS Coverage | Platform |
|---------|----------|----------------------|------|--------------|----------|
| PD42923 | PD42923a | Tumour               | N    | 43.68        | X10      |
| PD42923 | PD42923b | Blood                | N    | 31.46        | X10      |
| PD42923 | PD42923c | Kidney               | N    | 31.74        | X10      |
| PD42923 | PD42923d | Ganglion             | Y    | 25.47        | X10      |
| PD42923 | PD42923e | Nerve                | Y    | 26.19        | X10      |
| PD42923 | PD42923f | Tumour               | Y    | 22.22        | X10      |
| PD42923 | PD42923g | Kidney               | Y    | 25.61        | X10      |
| PD46555 | PD46555a | Tumour               | N    | 36.98        | Novaseq  |
| PD46555 | PD46555d | Dorsal nerve roots   | N    | 31.34        | Novaseq  |
| PD46555 | PD46555e | Ventral nerve roots  | N    | 36.65        | Novaseq  |
| PD46555 | PD46555f | Spinal cord          | N    | 35.86        | Novaseq  |
| PD46555 | PD46555g | Upper cervical spine | N    | 27.26        | Novaseq  |
| PD46555 | PD46555h | Spinal cord          | N    | 29.7         | Novaseq  |
| PD46555 | PD46555i | Posterior dura       | N    | 40.78        | Novaseq  |
| PD46555 | PD46555j | Fat                  | N    | 28.48        | Novaseq  |
| PD46555 | PD46555k | Fat                  | N    | 34.98        | Novaseq  |
| PD46555 | PD46555l | Muscle               | N    | 34.45        | X10      |
| PD46555 | PD46555m | Muscle               | N    | 29.79        | Novaseq  |
| PD46555 | PD46555r | Skin                 | N    | 39.51        | Novaseq  |
| PD46555 | PD46555s | Skin                 | N    | 30.62        | Novaseq  |
| PD46555 | PD46555w | Blood                | N    | 30.77        | Novaseq  |

**Supplementary Table 1 | Overview of WGS data.**

| Patient line | Diagnosis                              | Source        |
|--------------|----------------------------------------|---------------|
| 60T          | Malignant Rhabdoid Tumor of the Kidney | Primary Tumor |
| 78T          | Malignant Rhabdoid Tumor of the Kidney | Primary Tumor |
| 103T         | Malignant Rhabdoid Tumor of the Kidney | Primary Tumor |

**Supplementary Table 2 | MRT organoid features.**

| Sample name       | Original ID              | Patient line       | Details              | Gender               | 10X kit | average reads/cell |
|-------------------|--------------------------|--------------------|----------------------|----------------------|---------|--------------------|
| MRT_60T_CTRL      | 5640STDY7891142          | 60T                | MRT Control          | male                 | 3' v2   | 35970              |
| MRT_60T_SMB       | 5640STDY7891143          | 60T                | MRT <i>SMARCB1</i> + | male                 | 3' v2   | 490249             |
| MRT_78and103_CTRL | snRNA10x-Lars-CTRL-17579 | 78T and 103T mixed | MRT Control          | 78T=male,103T=female | 3' v3   | 34798              |
| MRT_78and103_SMB  | snRNA10x-Lars-SMB1-17580 | 78T and 103T mixed | MRT <i>SMARCB1</i> + | 78T=male,103T=female | 3' v3   | 44561              |

| Sample name       | sequencing platform | Genome reference | cellranger version | %mito | SMARCB1 filter | gene cutoff |
|-------------------|---------------------|------------------|--------------------|-------|----------------|-------------|
| MRT_60T_CTRL      | Illumina HiSeq 4000 | GRCh38 1.2.0     | 2.0.2              | 10    | SMARCB1 > 0    | none        |
| MRT_60T_SMB       | Illumina HiSeq 4000 | GRCh38 1.2.0     | 2.0.2              | 10    | SMARCB1 == 0   | none        |
| MRT_78and103_CTRL | NextSeq 500         | GRCh38 1.2.0     | 3.0.3              | 20    | SMARCB1 > 0    | 1500        |
| MRT_78and103_SMB  | NextSeq 500         | GRCh38 1.2.0     | 3.0.3              | 20    | SMARCB1 == 0   | 1500        |

| Sample name       | EGA ID                                                             |
|-------------------|--------------------------------------------------------------------|
| MRT_60T_CTRL      | EGAN00002133134                                                    |
| MRT_60T_SMB       | EGAN00002133135                                                    |
| MRT_78and103_CTRL | EGAN00002580391, EGAN00002580392, EGAN00002580393, EGAN00002580394 |
| MRT_78and103_SMB  | EGAN00002580397, EGAN00002580398                                   |



**Supplementary Table 3 | Sample processing info scRNA-seq.**

| Supplementary Fig. 3g               |                                     |             |             |
|-------------------------------------|-------------------------------------|-------------|-------------|
| Cell Type                           | SMARCB1 vs Control                  | 78T         | 103T        |
| Sensory                             | 60T<br>4.58133E-28                  | 3.14728E-22 | 1.75E-08    |
| Migratory.1                         | 0.2275684                           | 3.315E-15   | 0.08191271  |
| Migratory.2                         | 5.89544E-67                         | 0.00003463  | 0           |
| Mesenchyme                          | 0.0002235                           | 4.20523E-12 | 0.0006274   |
| Autonomic                           | 0.02985853                          | 7.49681E-93 | 1.3824E-57  |
| Supplementary Fig. 3h               |                                     |             |             |
| Cell Type                           | SMARCB1 vs Control                  | 78T         | 103T        |
| Early mesenchyme                    | 60T<br>1.48789E-35                  | 2.00176E-18 | 4.454E-173  |
| Connective tissue progenitors       | 1.59887E-80                         | 2.41191E-68 | 2.6248E-127 |
| Intermediate mesoderm               | 0.01167182                          | 6.39985E-07 | 3.7136E-12  |
| Schwann cell precursors             | 5.15326E-07                         | 0.3710319   | 0.4429936   |
| Sensory neurons                     | 0.000473307                         | 1.88498E-23 | 6.4646E-141 |
| Neural tube                         | 0.007759082                         | 1.6638E-27  | 7.40169E-21 |
| Neural progenitor cells             | 7.6889E-15                          | 1.73252E-35 | 5.59331E-73 |
| Radial glia                         | 1.20211E-16                         | 1.41149E-24 | 6.9577E-111 |
| Supplementary Fig. 8c               |                                     |             |             |
| Drug                                | Comparison vs normal kidney donor 1 | 78T         | 103T        |
| mTORi (2nM)                         | 60T<br>5.78324E-06                  | 0.016856109 | 2.35666E-05 |
| HDACi (1µM)                         | 0.003957308                         | 0.014547196 | NA          |
| Combi (2nM, 1µM)                    | 0.000197062                         | 0.000667108 | NA          |
| HDACi (3µM)                         | NA                                  | 5.37192E-06 | 5.74512E-05 |
| Combi (2nM, 3µM)                    | NA                                  | 9.53401E-05 | 0.000535419 |
| Comparison vs normal kidney donor 2 |                                     |             |             |
| Drug                                | Comparison vs normal kidney donor 2 | 78T         | 103T        |
| mTORi (2nM)                         | 60T<br>0.001134997                  | 0.927179112 | 0.008510203 |
| HDACi (1µM)                         | 0.000573236                         | 0.025865327 | NA          |
| Combi (2nM, 1µM)                    | 9.5596E-05                          | 0.001887569 | NA          |
| HDACi (3µM)                         | NA                                  | 0.000168    | 0.001769478 |
| Combi (2nM, 3µM)                    | NA                                  | 0.000388825 | 0.001892323 |

**Supplementary Table 4 | Exact p-values.**
